# Supplementary material
Source: PubMed Central journal article supplement (PMC8478466)
Supplement: aem.01236-21-s0001.pdf [file aem.01236-21-s0001.pdf]

1 **Supplementary Information**

2

3 **Beneficial cyanosphere heterotrophs accelerate establishment of cyanobacterial biocrust**

4

Corey Nelson and Ferran Garcia-Pichel

5

6 **Supplementary Tables**

| Laboratory trials on sterile soil substrates |                |             |             |             |              |
|----------------------------------------------|----------------|-------------|-------------|-------------|--------------|
| Treatments                                   | Wetting events |             |             |             |              |
|                                              | 0              | 3           | 6           | 9           | 12           |
| <i>M. vaginatus</i>                          | 0.63 ± 0.17    | 2.59 ± 0.54 | 3.57 ± 0.36 | 3.81 ± 0.21 | 4.11 ± 0.31  |
| K12                                          | 0.53 ± 0.21    | 2.74 ± 0.21 | 2.76 ± 0.37 | 3.16 ± 0.13 | 3.02 ± 0.28  |
| O80                                          | 0.27 ± 0.18    | 2.98 ± 0.24 | 3.49 ± 0.34 | 6.57 ± 0.94 | 6.36 ± 0.69  |
| O64                                          | 0.54 ± 0.35    | 2.23 ± 0.45 | 3.04 ± 0.62 | 6.51 ± 0.28 | 4.97 ± 1.24  |
| METH4                                        | 0.45 ± 0.21    | 2.05 ± 0.34 | 3.56 ± 0.61 | 6.65 ± 1.22 | 6.36 ± 0.69  |
| Mixture                                      | 0.54 ± 0.21    | 2.05 ± 0.34 | 4.62 ± 0.45 | 7.15 ± 0.95 | 11.92 ± 1.58 |

7

8 **Table S1.** Chlorophyll *a* areal concentration for laboratory trials of *M. vaginatus* grown alone

9 and in co-culture with different heterotrophic isolates (*Escherichia coli* K12, *Arthrobacter* sp.

10 O80, *Bacillus* sp. O64, *Massilia* sp. METH4) or as an equal proportion mixture of cyanosphere

11 heterotrophs (Mixture) for 12 wetting events on sterile soil substrates given in mg Chl *a* m<sup>-2</sup>

12 (*n*=3; ± standard deviation). Chl *a* values for uninoculated controls were below detection for the

13 duration of experiment and are not shown.

14

15

16

17

18

19

| Outdoor trials on hot desert soil substrates  |                |            |            |            |             |
|-----------------------------------------------|----------------|------------|------------|------------|-------------|
| Treatments                                    | Wetting events |            |            |            |             |
|                                               | 0              | 3          | 6          | 9          | 12          |
| Control                                       | 0.3 ± 0.04     | 0.3 ± 0.1  | 0.3 ± 0.1  | 0.4 ± 0.1  | 0.6 ± 0.4   |
| Heterotrophs                                  | 0.3 ± 0.04     | 0.3 ± 0.04 | 0.3 ± 0.1  | 0.4 ± 0.1  | 0.3 ± 0.1   |
| Cyanobacteria                                 | 4.7 ± 0.4      | 2.4 ± 0.8  | 5.3 ± 0.9  | 10.3 ± 4.9 | 14.3 ± 6.0  |
| Consortium                                    | 4.3 ± 0.7      | 4.0 ± 1.9  | 20.0 ± 5.7 | 40.0 ± 5.9 | 37.4 ± 12.1 |
| Outdoor trials on cold desert soil substrates |                |            |            |            |             |
| Treatments                                    | Wetting events |            |            |            |             |
|                                               | 0              | 3          | 6          | 9          | 12          |
| Control                                       | 6.9 ± 0.8      | 3.8 ± 0.3  | 7.4 ± 1.8  | 8.9 ± 1.2  | 10.7 ± 1.0  |
| Heterotrophs                                  | 7.1 ± 1.1      | 6.8 ± 1.4  | 10.3 ± 2.0 | 18.5 ± 4.7 | 15.5 ± 2.9  |
| Cyanobacteria                                 | 9.1 ± 1.5      | 12.9 ± 2.4 | 21.6 ± 6.0 | 15.4 ± 1.4 | 14.2 ± 2.3  |
| Consortium                                    | 9.4 ± 2.0      | 10.3 ± 2.8 | 21.9 ± 2.9 | 22.2 ± 3.9 | 17.5 ± 3.2  |

20

21 **Table S2.** Chlorophyll *a* areal concentrations, given in mg Chl *a* m<sup>-2</sup> (*n*=5; ± standard deviation),

22 of unsterilized hot and cold desert soil substrates inoculated with beneficial heterotrophs

23 (Heterotrophs), pioneer cyanobacteria (Cyanobacteria), or with both beneficial heterotrophs and

24 cyanobacteria (Consortium) under field conditions for 12 wetting events.

25

26

27

28

29

30

31

32

33

34

35

36

| Hot Desert    |                     |     |       | Cold Desert   |                     |     |       |
|---------------|---------------------|-----|-------|---------------|---------------------|-----|-------|
| Treatment     | Cyanosphere Isolate |     |       | Treatment     | Cyanosphere Isolate |     |       |
|               | O64                 | O80 | METH4 |               | O64                 | O80 | METH4 |
| Control       | -                   | -   | -     | Control       | -                   | +++ | -     |
| Heterotroph   | +++                 | +++ | -     | Heterotroph   | -                   | +++ | ++    |
| Cyanobacteria | -                   | -   | -     | Cyanobacteria | -                   | +++ | -     |
| Consortium    | +++                 | +++ | -     | Consortium    | +                   | +++ | +     |

37

38 **Table S3.** Presence of sequences matching those of the cyanosphere heterotrophs (*Bacillus* sp.  
39 O64, *Arthrobacter* sp. O80, *Massilia* sp. METH4) in final bacterial community for outdoor trials  
40 from hot and cold desert locations ( $n=3$ ). Crosses (+, ++, +++) represent number of samples in  
41 each treatment with detected cyanosphere isolate sequences, while dashes (-) represent their  
42 absence.

43

44

45

46

47

48

49

50

51

52

53

54

55

56

57 **Supplementary Figures**

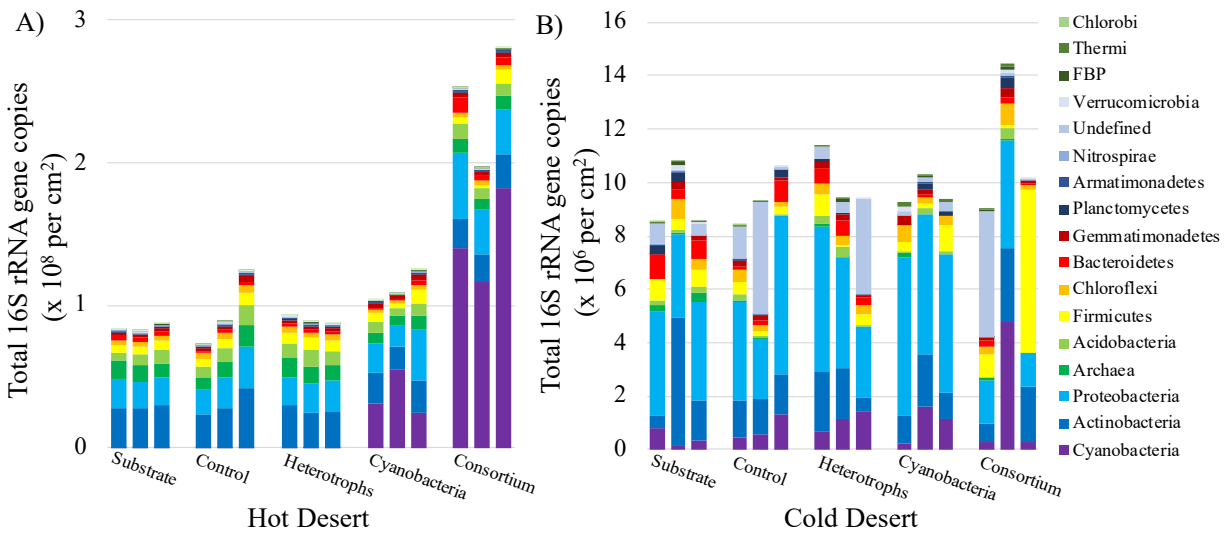

58

59 **Figure S1.** Bacterial abundance and community structure of original hot and cold desert soil

60 substrates (Substrate) and of unsterilized hot and cold desert soil substrates inoculated with

61 beneficial heterotrophs (Heterotrophs), *Microcoleus* spp. (Cyanobacteria), or with both beneficial

62 heterotrophs and cyanobacteria (Consortium) at phylum-level as determined by high-throughput

63 16S rRNA gene analysis coupled to qPCR. Treatments and uninoculated control (Control) were

64 subjected to 12 wetting events under field conditions.

65

66

67

68

69

70

71

72

73

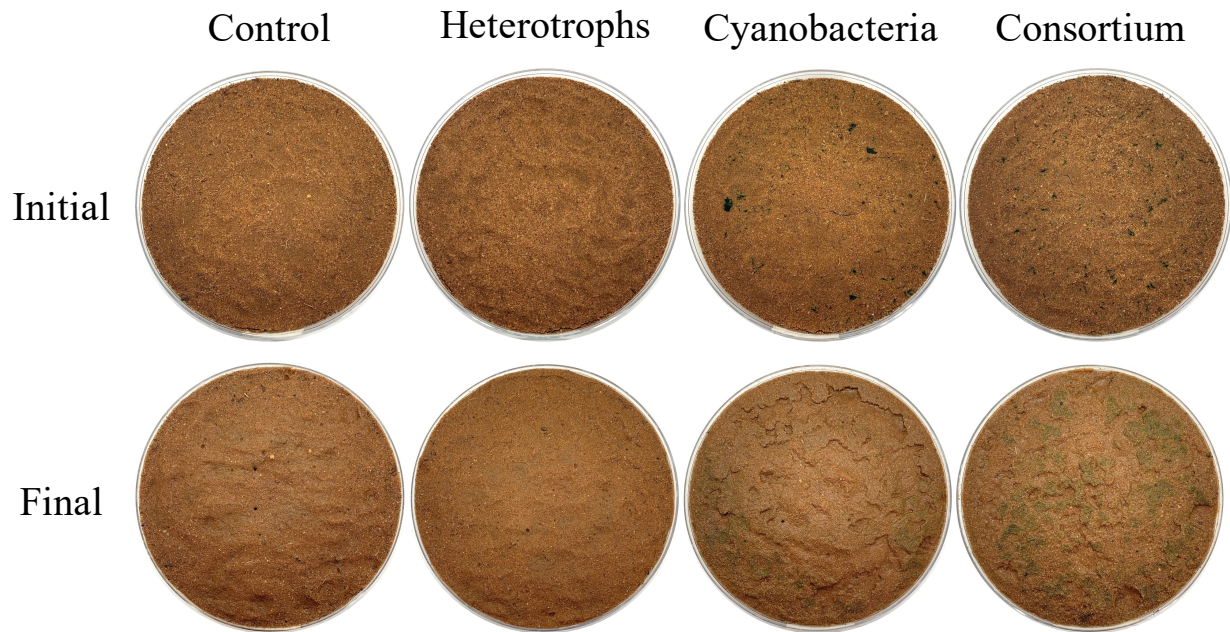

74

75 **Figure S2.** Visual aspect of unsterilized hot desert soil substrates inoculated with beneficial  
76 heterotrophs (Heterotrophs), *Microcoleus* spp. (Cyanobacteria), or both beneficial heterotrophs  
77 and cyanobacteria (Consortium), as well as uninoculated controls (Control) after incubation for  
78 12 wetting events. Visible formation of biocrust can be seen at the final timepoint of the  
79 Cyanobacteria and Consortium treatments.

80

81

82

83

84

85

86

87

88

89

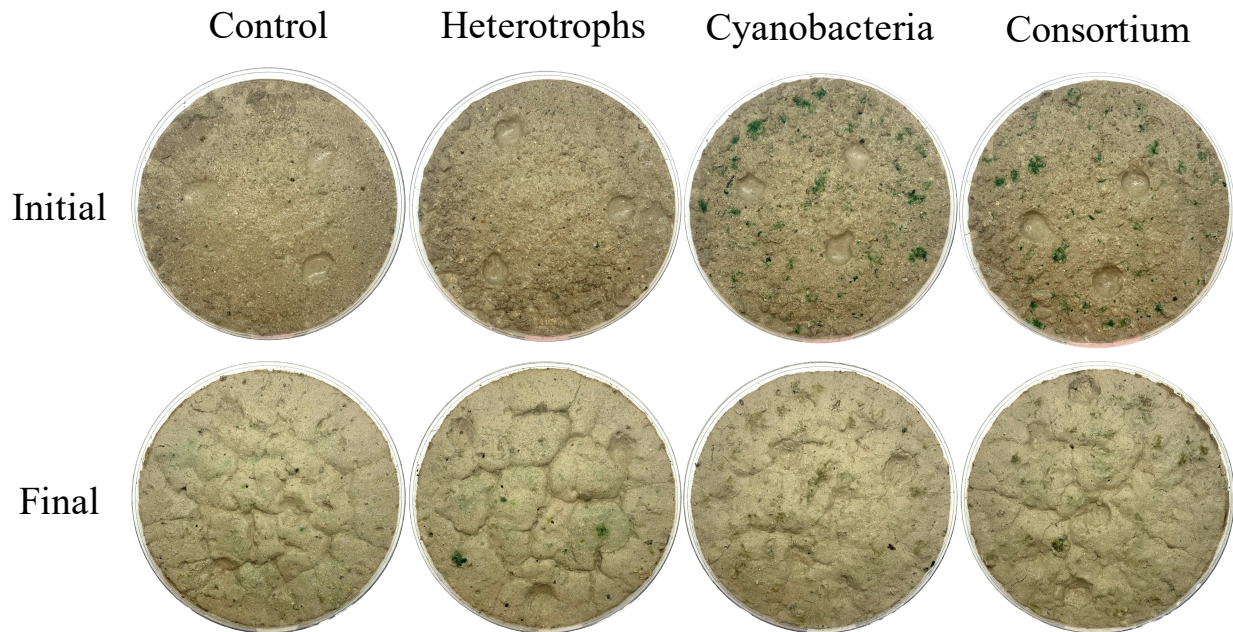

90

91 **Figure S3.** Visual aspect of unsterilized cold desert soil substrates inoculated with beneficial  
92 heterotrophs (Heterotrophs), *Microcoleus* spp. (Cyanobacteria), or with both beneficial  
93 heterotrophs and cyanobacteria (Consortium), as well as uninoculated controls (Control) after  
94 incubation for 12 wetting events. Visible green coloring on Cyanobacteria and Consortium  
95 treatments at initial timepoint is due to phototrophic biomass additions.

96

97

98

99

100

101

102

103

104

105
